# Supplementary material
Source: Elsevier journal article supplement (https://www.sciencedirect.com/science/article/pii/S0213911122001716)
Supplement: mmc4 [file S0213911122001716:mmc4.doc]

# Questionnaire for Argentian and international policy-makers

**Questionnaire for health policy-makers – Argentina and International**

Date of interview: |__|__|-|__|__|-|__|__|__|__|

First name: _______________________ Last name(s): _____________________

Sex: F |__| M |__|

Date of birth: |__|__|-|__|__|-|__|__|__|__|

What is your background?

Political sciences |__|

Public health |__|

Economics |__|

Medicine |__|

Other: ________________________________________________________

In which organization do you work? ______________________________________________

Where is this organization based? ______________________________________

How many years have you been working in this organization? ____________________________________

What is your role in this organization? ________________________________________

How many years of experience do you have in the public health sector?

< 5 years |__|

5-10 years |__|

10-20 years |__|

More than 20 years |__|

**Discrete choice experiment (DCE)**

**Note for the interviewer**

*Definition of the DCE variables:*

For the prophylactic vaccine:

**Protection duration**. How often should the vaccination take place in the population for it to be accepted?

Options: only once, every 3 years, every 5 years, every 10 years

**Way of administration**

Options: needle; no needle (e.g. sublingual, nasal)

**Number of doses**: How many doses can be sustainable for the health system?

Options: 2; 3; 4

**Cost of the vaccine**: Acceptable increase in health budget spent on vaccination to cover the cost of immunizing the whole population at risk in the country?

Options: 5% increase; 10% increase; 20% increase

**Target population:** Who should be prioritized for vaccination?

Options: children (below 12 years of age); the remaining of the population (above 12 years old); everyone

**Effectiveness:** Acceptable reduction in the probability of becoming infected?

Options: 30%; 60%; 90%

For the therapeutic vaccine:

**Way of administration**

Options: Needle; No needle (e.g. sublingual, nasal)

**Number of doses:** How many doses should Chagas patients be willing to accept to get cured?

Options: 2; 3; 4

**Cost** of the vaccine: Acceptable increase in health budget spent on the medical attention devoted to Chagas disease patients (in order to treat the whole population afflicted with Chagas disease)?

Options: 5% increase; 10% increase; 20% increase

**Target population:** Who should be prioritized for therapeutic vaccination?

Options: children (below 12 years of age); the remaining of the population (above 12 years old); everyone

**Effectiveness:** Probability of being cured

Options: 30%; 60%; 90%

**Read to the participant:**

Two vaccines are currently being developed for Chagas disease: one to prevent infection and one to cure it. For each vaccine, we would like to know which option you would choose between A and B

**We start with the prophylactic vaccine:**

|  | 1 | |
| --- | --- | --- |
| A | B |
| Vaccination frequency | Every 5 years | Only once |
| Way of administration | Needle | No needle |
| Number of doses | 3 | 4 |
| Cost | 20% increase | 5% increase |
| Target population | Above 12 years old | Childen (below 12 years old) |
| Effectiveness | 90% | 30% |

|  | 2 | |
| --- | --- | --- |
| A | B |
| Vaccination frequency | Every 3 years | Every 10 years |
| Way of administration | Needle | No needle |
| Number of doses | 3 | 2 |
| Cost | 10% increase | 20% increase |
| Target population | Below 12 years old | Everyone |
| Effectiveness | 30% | 90% |

|  | 3 | |
| --- | --- | --- |
| A | B |
| Vaccination frequency | Every 10 years | Only once |
| Way of administration | Needle | No needle |
| Number of doses | 4 | 2 |
| Cost | 20% increase | 5% increase |
| Target population | Below 12 years old | Everyone |
| Effectiveness | 60% | 90% |

|  | 4 | |
| --- | --- | --- |
| A | B |
| Vaccination frequency | Only once | Every 5 years |
| Way of administration | No needle | Needle |
| Number of doses | 3 | 2 |
| Cost | 10% increase | 5% increase |
| Target population | Below 12 years old | Everyone |
| Effectiveness | 90% | 30% |

|  | 5 | |
| --- | --- | --- |
| A | B |
| Vaccination frequency | Only once | Every 3 years |
| Way of administration | Needle | No needle |
| Number of doses | 4 | 3 |
| Cost | 10% increase | 20% increase |
| Target population | Everyone | Below 12 years old |
| Effectiveness | 60% | 30% |

|  | 6 | |
| --- | --- | --- |
| A | B |
| Vaccination frequency | Every 5 years | Every 3 years |
| Way of administration | No needle | Needle |
| Number of doses | 3 | 2 |
| Cost | 10% increase | 5% increase |
| Target population | Everyone | Below 12 years old |
| Effectiveness | 30% | 90% |

|  | 7 | |
| --- | --- | --- |
| A | B |
| Vaccination frequency | Every 5 years | Every 10 years |
| Way of administration | No needle | Needle |
| Number of doses | 2 | 3 |
| Cost | 10% increase | 5% increase |
| Target population | Below 12 years old | Everyone |
| Effectiveness | 60% | 30% |

|  | 8 | |
| --- | --- | --- |
| A | B |
| Vaccination frequency | Every 10 years | Every 5 years |
| Way of administration | No needle | Needle |
| Number of doses | 2 | 4 |
| Cost | 10% increase | 20% increase |
| Target population | Above 12 years old | Below 12 years old |
| Effectiveness | 60% | 90% |

|  | 9 | |
| --- | --- | --- |
| A | B |
| Vaccination frequency | Every 3 years | Only once |
| Way of administration | No needle | Needle |
| Number of doses | 3 | 2 |
| Cost | 5% increase | 20% increase |
| Target population | Everyone | Above12 years old |
| Effectiveness | 60% | 30% |

|  | 10 | |
| --- | --- | --- |
| A | B |
| Vaccination frequency | Every 3 years | Only once |
| Way of administration | No needle | Needle |
| Number of doses | 4 | 3 |
| Cost | 10% increase | 5% increase |
| Target population | Everyone | Below 12 years old |
| Effectiveness | 90% | 60% |

|  | 11 | |
| --- | --- | --- |
| A | B |
| Vaccination frequency | Every 10 years | Only once |
| Way of administration | Needle | No needle |
| Number of doses | 2 | 4 |
| Cost | 10% increase | Aumento del 20% |
| Target population | Below 12 years old | Above 12 years old |
| Effectiveness | 90% | 60% |

|  | 12 | |
| --- | --- | --- |
| A | B |
| Vaccination frequency | Every 3 years | Every 5 years |
| Way of administration | Needle | No needle |
| Number of doses | 2 | 4 |
| Cost | 20% increase | 5% increae |
| Target population | Everyone | Above12 years old |
| Effectiveness | 60% | 90% |

**Now, for the therapeutic vaccine:**

|  | 1 | |
| --- | --- | --- |
| A | B |
| Way of administration | No needle | Needle |
| Number of doses | 3 | 4 |
| Cost | 10% increase | 5% increase |
| Target population | Everyone | Above 12 years old |
| Effectiveness | 60% | 30% |

|  | 2 | |
| --- | --- | --- |
| A | B |
| Way of administration | Needle | No needle |
| Number of doses | 3 | 4 |
| Cost | 5% increase | 10% increase |
| Target population | Below 12 years old | Everyone |
| Effectiveness | 60% | 90% |

|  | 3 | |
| --- | --- | --- |
| A | B |
| Way of administration | No needle | Needle |
| Number of doses | 4 | 2 |
| Cost | 5% increase | 20% increase |
| Target population | Below 12 years old | Above 12 years old |
| Effectiveness | 30% | 90% |

|  | 4 | |
| --- | --- | --- |
| A | B |
| Way of administration | No needle | Needle |
| Number of doses | 3 | 2 |
| Cost | 10% increase | 20% increase |
| Target population | Below 12 years old | Everyone |
| Effectiveness | 90% | 60% |

|  | 5 | |
| --- | --- | --- |
| A | B |
| Way of administration | No needle | Needle |
| Number of doses | 2 | 3 |
| Cost | 5% increase | 20% increase |
| Target population | Everyone | Below 12 years old |
| Effectiveness | 60% | 30% |

|  | 6 | |
| --- | --- | --- |
| A | B |
| Way of administration | Needle | No needle |
| Number of doses | 4 | 2 |
| Cost | 10% increase | 5% increase |
| Target population | Everyone | Above 12 years old |
| Effectiveness | 90% | 30% |

|  | 7 | |
| --- | --- | --- |
| A | B |
| Way of administration | No needle | Needle |
| Number of doses | 2 | 3 |
| Cost | 5% increase | 20% increase |
| Target population | Below 12 years old | Above 12 years old |
| Effectiveness | 90% | 30% |

|  | 8 | |
| --- | --- | --- |
| A | B |
| Way of administration | No needle | Needle |
| Number of doses | 3 | 2 |
| Cost | 20% increase | 10% increase |
| Target population | Below 12 years old | Above 12 years old |
| Effectiveness | 60% | 30% |

|  | 9 | |
| --- | --- | --- |
| A | B |
| Way of administration | No needle | Needle |
| Number of doses | 4 | 3 |
| Cost | 20% increase | 5% increase |
| Target population | Below 12 years old | Everyone |
| Effectiveness | 60% | 30% |

|  | 10 | |
| --- | --- | --- |
| A | B |
| Way of administration | No needle | Needle |
| Number of doses | 2 | 4 |
| Cost | 20% increase | 5% increase |
| Target population | Below 12 years old | Above12 years old |
| Effectiveness | 90% | 60% |

|  | 11 | |
| --- | --- | --- |
| A | B |
| Way of administration | Needle | No needle |
| Number of doses | 3 | 2 |
| Cost | 5% increase | 10% increase |
| Target population | Everyone | Above 12 years old |
| Effectiveness | 90% | 60% |

|  | 12 | |
| --- | --- | --- |
| A | B |
| Way of administration | Needle | No needle |
| Number of doses | 3 | 4 |
| Cost | 10% increase | 20% increase |
| Target population | Below 12 years old | Everyone |
| Effectiveness | 60% | 30% |
