# Supplementary material
Source: Elsevier journal article supplement (https://www.sciencedirect.com/science/article/pii/S0213911122001716)
Supplement: mmc5 [file S0213911122001716:mmc5.doc]

## Data collection and management

In Spain, DCE and HRQoL data will be collected passively from patients attending the International Health Service at the Hospital Clínic of Barcelona after being screened for Chagas disease, or after being treated or visited if previously diagnosed positive. The sample size is of a minimum of 250 interviews, corresponding to the number of contacts with Chagas disease patients expected to be seen over 5 months (data collection period allowed by budgetary resources). Interviews will be conducted by health care workers already involved in health care services for patients with *T. cruzi* infection.

In Argentina, in the province of San Juan, two data collection strategies will be employed for the recruitment of patients infected by *T. cruzi*. A passive data collection strategy, where: (a) all patients who are admitted or attend their check-ups at the Chagas program clinic of the Rawson Hospital (the provincial referral hospital in San Juan capital) will be surveyed; (b) individuals who attend other services at Rawson Hospital and who are seronegative for *T. cruzi* infection or are unaware of their serostatus will be surveyed. An active data collection strategy, where: (a) in urban areas, the "René Favaloro" Training Centre in Health Region V, located in the Department of Rawson, will be contacted to identify and interview patients who have been diagnosed with Chagas disease; (b) in rural areas, patients on healthcare registries or previously diagnosed in serological surveys conducted by the Chagas Program of San Juan will be identified and reached at their homes.

In the province of Chaco, data collection will be carried out in the municipalities of Quitilipi (Quitilipi Department), Pampa del Indio (Libertador San Martín Department) and Juan José Castelli (General Güemes Department). Members of the staff at the Clinical Analysis Laboratories in Quitilipi and Pampa del Indio will ask all individuals diagnosed with *T. cruzi* infection to answer the questionnaire. The survey will be administrated when delivering test results. Individuals with negative test results for *T. cruzi* infection will also be surveyed. Furthermore, the records of the Clinical Analysis Laboratories of Quitilipi, Juan José Castelli and Pampa del Indio will be reviewed. Patients that were previously diagnosed with *T. cruzi* infection will be identified and invited to answer the questionnaire. Of note, in this province data collection will focus particularly on the subpopulation of pregnant women.

About 15 health policy makers with expertise in Chagas disease will be identified at different levels of the health systems of Argentina and Spain and also at the international level. The pool of international policy makers includes experts from the World Health Organization and the Pan American Health Organization. In Spain, representatives will be identified from different levels of government and from different autonomous communities where health policies related to Chagas disease have been implemented. A representative from the central government will be interviewed, together with representatives from the governments of the autonomous communities where protocols for the control of vertical transmission of the infection, in addition to the blood bank are in place (i.e., Catalonia, Basque Country, Valencia, Madrid, and Murcia). In Argentina, representatives were identified from different levels of government and different epidemiological scenarios. For example, San Juan has a high risk of transmission and has urban triatomism, whilst Chaco is at high risk with high socio-sanitary vulnerability.

## Technical aspects

Data collection in Barcelona and Argentina will be conducted using tablets, which will be previously configured in Barcelona. Once collected, data will be transferred from the tablets to the *ad hoc* server in Barcelona via internet. The database will be managed through the REDCap platform (<https://www.project-redcap.org/>). REDCap is a web access application, and the server has an SSL security certificate that allows encrypting the data transferred between the client and the server. All data managed by the REDCap Mobile App that is downloaded or sent to the REDCap server is transmitted using the REDCap API (API RESTful web service). Therefore, the data transmitted to and from the REDCap Mobile App is done using a secure and encrypted transmission, using the SSL/HTTPS protocol. To improve security, the REDCap Mobile App also verifies the SSL certificate of the REDCap server with which it communicates, to validate its identity, and prevent "Man in the Middle" attacks during data transfer. If the REDCap server does not have a security certificate from a Certificate Authority (CA), it is expired, or does not use SSL, a warning message will be displayed to the REDCap Mobile App user. Both server maintenance and data management will be the responsibility of the ISGlobal Biostatistics and Data Management Unit (<https://www.isglobal.org/research/biostatistics-and-data-management>).
