# Supplementary material
Source: Elsevier journal article supplement (https://www.sciencedirect.com/science/article/pii/S0213911122001716)
Supplement: mmc6 [file S0213911122001716:mmc6.pdf]

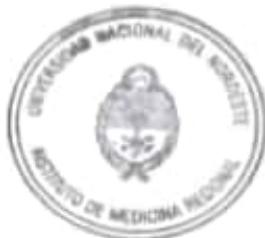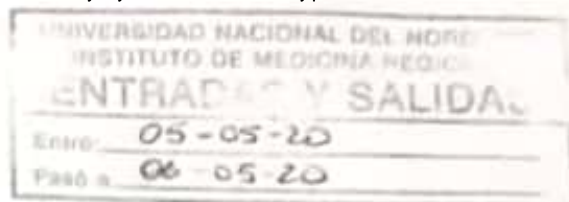

Resistencia, 06 de Mayo de 2020

Dra. Paula Sartor:

Considerando que el proyecto: "Vacuna para la prevención y tratamiento de la infección por T. cruzi (CRUZIVAX). Paquete de estudio de impacto económico"; y las modificaciones presentadas cumplen los requisitos éticos para el tipo de investigación propuesto, que el equipo de investigación es solvente y suficientemente formado, y que los objetivos del mismo beneficiarían a un gran número de personas, este comité resuelve: la aprobación de las modificaciones realizadas al proyecto, las mismas fueron realizadas por recomendación del Hospital de Clínicas de Barcelona, posterior a la aprobación por este comité de Ética.

Lic. Bettina L. Brusés

Mgter. En Ciencias del Medio Ambiente y la Salud-UNNE

Marcelo Marín

Dr. de la UBA

Horacio Lucero

Dr. en Bioquímica Humana- UBA
