# Supplementary material
Source: Elsevier journal article supplement (https://www.sciencedirect.com/science/article/pii/S0213911122001716)
Supplement: mmc7 [file S0213911122001716:mmc7.pdf]

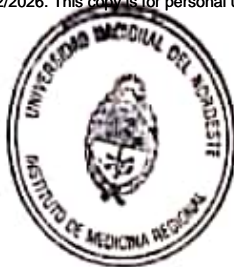

Resistencia, 9 de Diciembre de 2020

Dra. Paula Sartor:

Considerando que el proyecto: "Vacuna para la prevención y tratamiento de la infección por T. cruzi (CRUZIVAX). Paquete de estudio de impacto económico", y las modificaciones presentadas mediante nota de fecha 6 de Diciembre de 2020 en esta institución, cumplen los requisitos éticos para el tipo de investigación propuesto, que el equipo de investigación es solvente y suficientemente formado, y que los objetivos del mismo beneficiarán a un gran número de personas, este comité resuelve:

-Aprobar las modificaciones realizadas al proyecto ya que las mismas fueron confeccionadas por el Hospital de Clínicas de Barcelona, posterior a la aprobación del proyecto por este comité de Ética.

Lic. Bettina L. Brusés

Mgter en ciencias del medio ambiente y la salud-UNNE

Horacio Lucero

Doctor en Bioquímica Humana-UBA

Javier E. Mussín

Doctor de la UBA

|                                                                     |         |
|---------------------------------------------------------------------|---------|
| UNIVERSIDAD NACIONAL DEL NORDESTE<br>INSTITUTO DE MEDICINA REGIONAL |         |
| <b>ENTRADAS Y SALIDAS</b>                                           |         |
| Entró:                                                              | 9-12-20 |
| PARÓ a:                                                             | Adm.    |
