# Supplementary material
Source: Elsevier journal article supplement (https://www.sciencedirect.com/science/article/pii/S0213911122001716)
Supplement: mmc8 [file S0213911122001716:mmc8.pdf]

San Juan 02 de Julio de 2021.

Lic. Liliana Salva.

S / D

De nuestra mayor consideración,

Nos dirigimos a Ud., con el fin de poner en su conocimiento que el Comité Provincial de Ética en Investigación del Ministerio de Salud Pública de San Juan, en su reunión virtual del día 02 de Julio de 2021, ha evaluado en sus aspectos éticos y metodológicos el Protocolo de Investigación: *"Vacuna para la prevención y el tratamiento de la infección por Trypanosoma cruzi (CRUZIVAX)"*.

A tal efecto se deja constancia que este Comité no ha encontrado reparos éticos ni metodológicos para el desarrollo del estudio, por lo que se da por aprobado el proyecto de investigación mencionado.

Estado: **APROBADO.**

Sin otro particular, atentamente.



Dra. ANDREA PÉREZ PAZO  
PRESIDENTE C.E.I.  
Comité de Ética en Investigación  
Ministerio de Salud Pública - San Juan
