# Supplementary material
Source: Elsevier journal article supplement (https://www.sciencedirect.com/science/article/pii/S0213911122001716)
Supplement: mmc9 [file S0213911122001716:mmc9.pdf]

DICTAMEN DEL COMITÉ DE ÉTICA DE LA INVESTIGACIÓN CON MEDICAMENTOS

ANA LUCIA ARELLANO ANDRINO, Secretario del **Comité de Ética de la Investigación con medicamentos del Hospital Clínic de Barcelona**

Certifica:

Que este Comité ha evaluado la propuesta del promotor, para que se realice el estudio:

CÓDIGO:

DOCUMENTOS CON VERSIONES:

| Tipo                         | Subtipo                             | Versión         |
|------------------------------|-------------------------------------|-----------------|
| Protocolo                    |                                     | V1.1 03-12-2019 |
| Hoja Información de Paciente |                                     | V1.1 03-12-2019 |
| Hoja Información de Paciente | (responsables de política de salud) | V1.1 03-12-2019 |

TÍTULO: Vacuna para la prevención y tratamiento de la infección por Trypanosoma cruzi (CRUZIVAX). Paquete de estudio económico

PROMOTOR:

INVESTIGADOR PRINCIPAL: ELISA SICURI

y considera que, teniendo en cuenta la respuesta a las aclaraciones solicitadas (si las hubiera), y que:

- Se cumplen los requisitos necesarios de idoneidad del protocolo en relación con los objetivos del estudio y están justificados los riesgos y molestias previsibles.
- La capacidad del investigador y los medios disponibles son apropiados para llevar a cabo el estudio.
- Que se han evaluado la compensaciones económicas previstas (cuando las haya) y su posible interferencia con el respeto a los postulados éticos y se consideran adecuadas.
- Que dicho estudio se ajusta a las normas éticas esenciales y criterios deontológicos que rigen en este centro.
- Que dicho estudio cumple con las obligaciones establecidas por la normativa de investigación y confidencialidad que le son aplicables.
- Que dicho estudio se incluye en una de las líneas de investigación biomédica acreditadas en este centro, cumpliendo los requisitos necesarios, y que es viable en todos sus términos.

Este CEIm acepta que dicho estudio sea realizado, debiendo ser comunicado a dicho Comité Ético todo cambio en el protocolo o acontecimiento adverso grave.

y hace constar que:

Mod\_04 (V4 de 18/06/2018)

**Reg. HCB/2019/1018**

PR

Página 1/3

1º En la reunión celebrada el día 21/11/2019, acta 20/2019 se decidió emitir el informe correspondiente al estudio de referencia.

2º El CEIm del Hospital Clínic i Provincial, tanto en su composición como en sus PNTs, cumple con las normas de BPC (CPMP/ICH/135/95)

3º Listado de miembros:

**Presidente:**

- JOAQUIM FORÉS I VIÑETA (Médico Traumatólogo, HCB)

**Vicepresidente:**

- ANDREA SCALISE (Médico Farmacólogo Clínico, HCB)

**Secretario:**

- ANA LUCIA ARELLANO ANDRINO (Médico Farmacólogo Clínico, HCB)

**Vocales:**

- ITZIAR DE LECUONA (Jurista, Observatorio de Bioética y Derecho, UB)
- MONTSERRAT GONZALEZ CREUS (Trabajadora Social, Servicio de Atención al Usuario, HCB)
- JOSE RIOS GUILLERMO (Estadístico. Plataforma de Estadística Médica. IDIBAPS)
- OCTAVI SANCHEZ LOPEZ (Representante de los pacientes)
- MARIA JESÚS BERTRAN LUENGO (Médico Epidemiólogo, HCB)
- JOAQUÍN SÁEZ PEÑATARO (Médico Farmacólogo Clínico, HCB)
- SERGI AMARO DELGADO (Médico Neurólogo, HCB)
- JULIO DELGADO GONZÁLEZ (Médico Hematólogo, HCB)
- EDUARD GUASCH CASANY (Médico Cardiólogo, HCB)
- VIRGINIA HERNANDEZ GEA (Médico Hepatólogo, HCB)
- MARINA ROVIRA ILLAMOLA (Farmacéutico Atención Primaria, CAP Eixample)
- MIRIAM MENDEZ GARCÍA (Abogada, HCB)
- JOSE TOMAS ORTIZ PEREZ (Médico Cardiólogo, HCB)
- BEGOÑA GOMEZ PEREZ (Farmacéutica Hospitalaria, HCB)
- ELENA CALVO CIDONCHA (Farmacéutica Hospitalaria, HCB)
- CECILIA CUZCO CABELLOS (Enfermera, HCB)

En el caso de que se evalúe algún proyecto del que un miembro sea investigador/colaborador, este se ausentará de la reunión durante la discusión del proyecto.

Para que conste donde proceda, y a petición del promotor,

Barcelona, a 27 de enero de 2020

CIF – G-08431173

Mod\_04 (V4 de 18/06/2018)

**Reg. HCB/2019/1018**

PR

Página 3/3
