# Supplementary material
Source: Elsevier journal article supplement (https://www.sciencedirect.com/science/article/pii/S0213911122001716)
Supplement: mmc11 [file S0213911122001716:mmc11.doc]

# a informativa para el participante (pacientes)

**Responsables científicos del estudio:** *Dra Elisa Sicuri, Dra Maria Jesus Pinazo y Celine Aerts (Instituto de Salud Global de Barcelona, España)*

**¿Quiénes somos?**

Somos un grupo de investigadores de un centro de investigación de Barcelona. Formamos parte de un estudio que se llama CRUZIVAX. El objetivo de CRUZIVAX es de dar los primeros pasos hacia el desarrollo de la primera vacuna para enfermedad de Chagas. La vacuna tendrá un efecto tanto profiláctico (preventivo) como terapéutico (podrá curar). Aún es muy pronto para poder decir si la vacuna tendrá éxito: el estudio está en una fase muy temprana de desarrollo. Mientras tanto, queremos recoger alguna información que podría ser útil para acompañar el desarrollo de la vacuna.

**Introducción y objetivos:**

Le invitamos a participar en este estudio que quiere por un lado medir la calidad de vida relacionada con la salud de las personas que tienen enfermedad de Chagas o que, simplemente, hayan sido cribados; por otro lado, nos gustaría tener su opinión sobre algunas potenciales características de la vacuna que se está desarrollando. Concretamente, le haremos unas preguntas sobre su estado de salud, sobre como usted se siente hoy. Además, le enseñaremos una serie de opciones entre las cuales deberá escoger. Dichas opciones (acompañadas por imágenes) ilustran diferentes características de la vacuna: usted nos dirá cual opciones prefiere.

Antes de que usted decida participar (o no), usted necesita entender los objetivos del estudio y lo que su participación implicará. Tome su tiempo para leer la información que sigue o si lo precisa, me puede pedir que yo se la lea y explique. Siéntase libre de hacer preguntas en cualquier momento hasta que tenga clara toda la información recibida.

**¿Qué pasará si usted decide participar?**

Si usted decide participar en el estudio, le haremos unas preguntas sencillas (5 preguntas) y rápidas sobre su estado de salud físico y mental, sobre como usted se siente hoy. Le pediremos también de valorar como usted se siente hoy en una escala de 0 a 100. Además, le enseñaremos diferentes opciones de características de la vacuna y usted me dirá cuales prefiere. Durante la entrevista, usted no tiene que hablar de temas que no desea tratar. Nadie más estará presente a menos que usted quiera que alguien esté aquí presente.

¿Qué daños o molestias le puede ocasionar este estudio?

Este estudio no implica ningún cribado o intervención invasiva. Por esa razón no esperamos que le pueda ocasionar algún daño o molestia. El cuestionario tendrá una duración de unos 20 minutos aproximadamente. Usted puede parar la entrevista o dejar el estudio en cualquier momento ahora o en el futuro. Usted es libre, además, de no contestar a preguntas que le hagan sentir incómodo.

¿Cuáles beneficios usted puede esperar del estudio?

Usted no recibirá ningún pago (retribución económica) por su participación en el estudio. Sin embargo, los resultados del estudio nos ayudaran entender cuál es la calidad de vida de los pacientes con Chagas y, posiblemente, a mejorarla en el futuro. Por otro lado, los resultados nos ayudan entender cuáles son las preferencias de la población/de los pacientes sobre una potencial futura vacuna para la enfermedad con Chagas. Por esta razón, usted, así como toda la comunidad en riesgo de padecer esta infección se beneficiarán indirectamente y en el futuro de los resultados de este estudio.

¿Qué pasa si decido no participar en el estudio o si cambio de idea más tarde?

Usted es libre de no participar en el estudio o dejar su participación en cualquier momento sin dar ninguna explicación. No habrá ninguna repercusión sobre su atención en salud si usted decide no participar en el estudio.

¿Cómo se guardará la información que nos facilite y quien podrá verla?

Sus respuestas se conectarán a sus datos clínicos. Toda la información será codificada y será estrictamente confidencial. Solo los médicos y los investigadores del estudio podrán acceder a los datos. Todos los datos se guardarán en un sistema digital (en un server) y la información se manejará de manera estrictamente confidencial.

Los datos se tratarán con absoluta confidencialidad y de acuerdo al Reglamento (UE) 2016/679 del Parlamento Europeo y del Consejo, de 27 de abril de 2016, relativo a la protección de las personas físicas en lo que respecta al tratamiento de datos personales y a la libre circulación de estos datos y Ley Orgánica 3/2018, de 5 de diciembre, de protección de datos personales y garantía de los derechos digitales.

Los datos de salud se mantendrán disociados de los datos personales. Disociar los datos significa que su información de salud no podrá asociarse a usted ya que sus datos personales se sustituyen por un código. La información disociada se archivará para ser usada por investigadores del proyecto y sus socios de investigación. Todos los resultados del estudio serán presentados en una base de datos del grupo de participantes, nunca se presentarán datos de forma individual.

A continuación, le detallamos la información sobre la protección de datos personales, por favor léala detenidamente y consúltenos si tiene alguna duda:

**¿Quién es el responsable del tratamiento de sus datos personales?**

Responsable del Tratamiento: Fundación Privada Instituto de Salud Global Barcelona (ISGlobal), CIF: G65341695, Dirección postal: Calle Rosselló, número 132, 6ª de Barcelona (08036). Correo electrónico: [lopd@isglobal.org](mailto:lopd@isglobal.org)

Delegado de Protección de Datos, contacto: [lopd@isglobal.org](mailto:lopd@isglobal.org)

**¿Con qué finalidad tratamos sus datos personales?**

De acuerdo a su participación en el proyecto de investigación “Vaccine for prevention and treatment of Trypanosoma cruzi infection” (CRUZIVAX) cuyo objetivo final es de desarrollar vacunas contra la enfermedad de Chagas, el Responsable del Tratamiento le informa que, en cumplimiento de lo establecido en el Reglamento General de Protección de datos (en adelante RGPD) y la Ley Orgánica 3/2018, sus datos de carácter personal serán utilizados, para llevar a cabo la investigación a la que usted ha consentido participar.

Asimismo, es importante informarle que los datos de carácter personal, con el consentimiento que ha otorgado, también podrán serán utilizadas por otros proyectos / investigaciones dentro del área del presente proyecto, o bien en proyectos de investigación en salud global, tanto en enfermedades infecciosas como no-comunicables, y salud ambiental, para estudiar el efecto de los factores ambientales en la salud de las personas.

**¿Cuál es la legitimación para el tratamiento de sus datos personales?**

La base legal para el tratamiento de datos es el consentimiento del candidato que lo presta mediante la aceptación de la cláusula de tratamiento de datos. La obtención de sus datos es necesaria para llevar a cabo el proyecto de investigación sin las cuales no podría llevarse a cabo, sin perjuicio de que usted en cualquier momento tiene derecho a retirar los consentimientos prestados, sin que esto afecte la licitud del tratamiento realizado previamente a su retirada.

**¿Por cuánto tiempo conservaremos sus datos personales?**

Los datos proporcionados serán conservados mientras esté en activo el proyecto de investigación o bien los sucesivos proyectos de investigación dentro de la misma área o línea de investigación en los que se traten sus datos de carácter personal, de acuerdo a los criterios que establezca la legislación vigente.

**¿A qué destinatarios se comunicarán sus datos personales?**

Esta información será utilizada por el Grupo de Investigación encargado de la investigación / es (en particular, el investigador del estudio y sus colaboradores, autoridades sanitarias, y los monitores y auditores del promotor) los cuales estarán sometidos al deber de secreto inherente a su profesión, para comprobar los datos y procedimientos del estudio, pero siempre manteniendo la confidencialidad de los mismos de acuerdo con la legislación vigente. También será transmitida la información a los estamentos oficiales públicos o privados que, por obligación legal o necesidad material, deban acceder a los datos a efectos del correcto desarrollo del proyecto de investigación, de acuerdo a las buenas prácticas científicas. En ningún caso sus datos de carácter personal serán transferidos a terceros países u organización internacional, fuera de la Unión Europea.

**¿Cuáles son sus derechos cuando nos facilita sus datos personales?**

Usted es el responsable de la veracidad y corrección de los datos que nos entrega y tiene la facultad de ejercer los derechos de acceso, rectificación, supresión, limitación del tratamiento, portabilidad y de oposición de sus datos de acuerdo lo dispuesto en la normativa en materia de protección de datos. Para ejercerlos, deberá dirigirse por escrito al Delegado de Protección de Datos a [lopd@isglobal.org](mailto:lopd@isglobal.org) en cualquier caso se deberá adjuntar una fotocopia de su documento nacional de identificación o bien equivalente.

Por último, además de la posibilidad de ejercer sus derechos, si no está de acuerdo con el tratamiento realizado por la Entidad o considera infringidos sus derechos podrá presentar una reclamación en todo momento ante la Agencia Española de Protección de datos.

**Financiador del estudio:**

Este estudio está financiado por la Comisión Europea, H2020, subvención número 815418.

**¿A quién puedo contactar si tengo preguntas?**

Si usted tiene preguntas puede contactar al personal investigador de ISGlobal en Barcelona, España (Tel. 0034 93 227 1806) / email: elisa.sicuri@isglobal.org

**Consentimiento informado**

Nombre del participante __________________________________________

Nombre de la organización ____________________

Lugar _______________________

He leído la información escrita

He obtenido toda la información necesaria que el personal del estudio me ha explicado en un idioma que yo entiendo,

Y yo:

- Confirmo que mi decisión de participar en el estudio es totalmente voluntaria,
- Confirmo que he tenido la oportunidad de hacer preguntas sobre el estudio y me siento satisfecho con las respuestas que se me ha dado,
- He tenido tiempo suficiente para decidir ser parte del estudio,

| - Estoy de acuerdo en participar en el estudio, - Comprendo que puedo retirarme del estudio:   - Cuando quiera.  - Sin tener que dar explicaciones.  - Sin que esto repercuta en mis cuidados médicos. | | | | |  | |  |
| --- | --- | --- | --- | --- | --- | --- | --- |
| Ante la presente información que el Responsable del Tratamiento me ha otorgado, y habiendo entendido esta, ofrezco mi consentimiento al tratamiento de:  ☐ Mis datos personales para llevar a cabo el proyecto de investigación  ☐ Mis datos personales para llevar a cabo proyectos de investigación afines al presente o de la misma área de investigación. | | | | | | | |
| Firma del participante/ Huella de pulgar* |  |  |  | |  | | |
|  |  |  | Data (dd/mmm/yyyy) Hora (24hr) | | | | |
| Nombre del testigo* |  | | | | | | |
| Nombre de la persona que obtiene el consentimiento |  | | | | | | |
| **Confirmo haber explicado toda la información del estudio de manera clara. El participante ha entendido y ha dado su consentimiento *en presencia de un testigo (si aplica).** | | | | | | | |
| Firma de la persona que obtiene el consentimiento |  |  |  | | | | |
| * Testigo es necesario para los participantes que no puedan leer o escribir |  |  | Fecha (dd/mmm/yyyy) Hora (24hr) | | | | |

**Resultados del estudio**

Si usted está interesado/a, Le informaremos sobre los resultados de esta investigación.
